# Supplementary material for: Identification of the over alkylation sites of a protein by IAM in MALDI-TOF/TOF tandem mass spectrometry
Source: Royal Society of Chemistry journal article supplement (doi:10.1039/c5ra18595e), 2015-01-01
Supplement: c5ra18595e1.pdf [file c5ra18595e1.pdf]

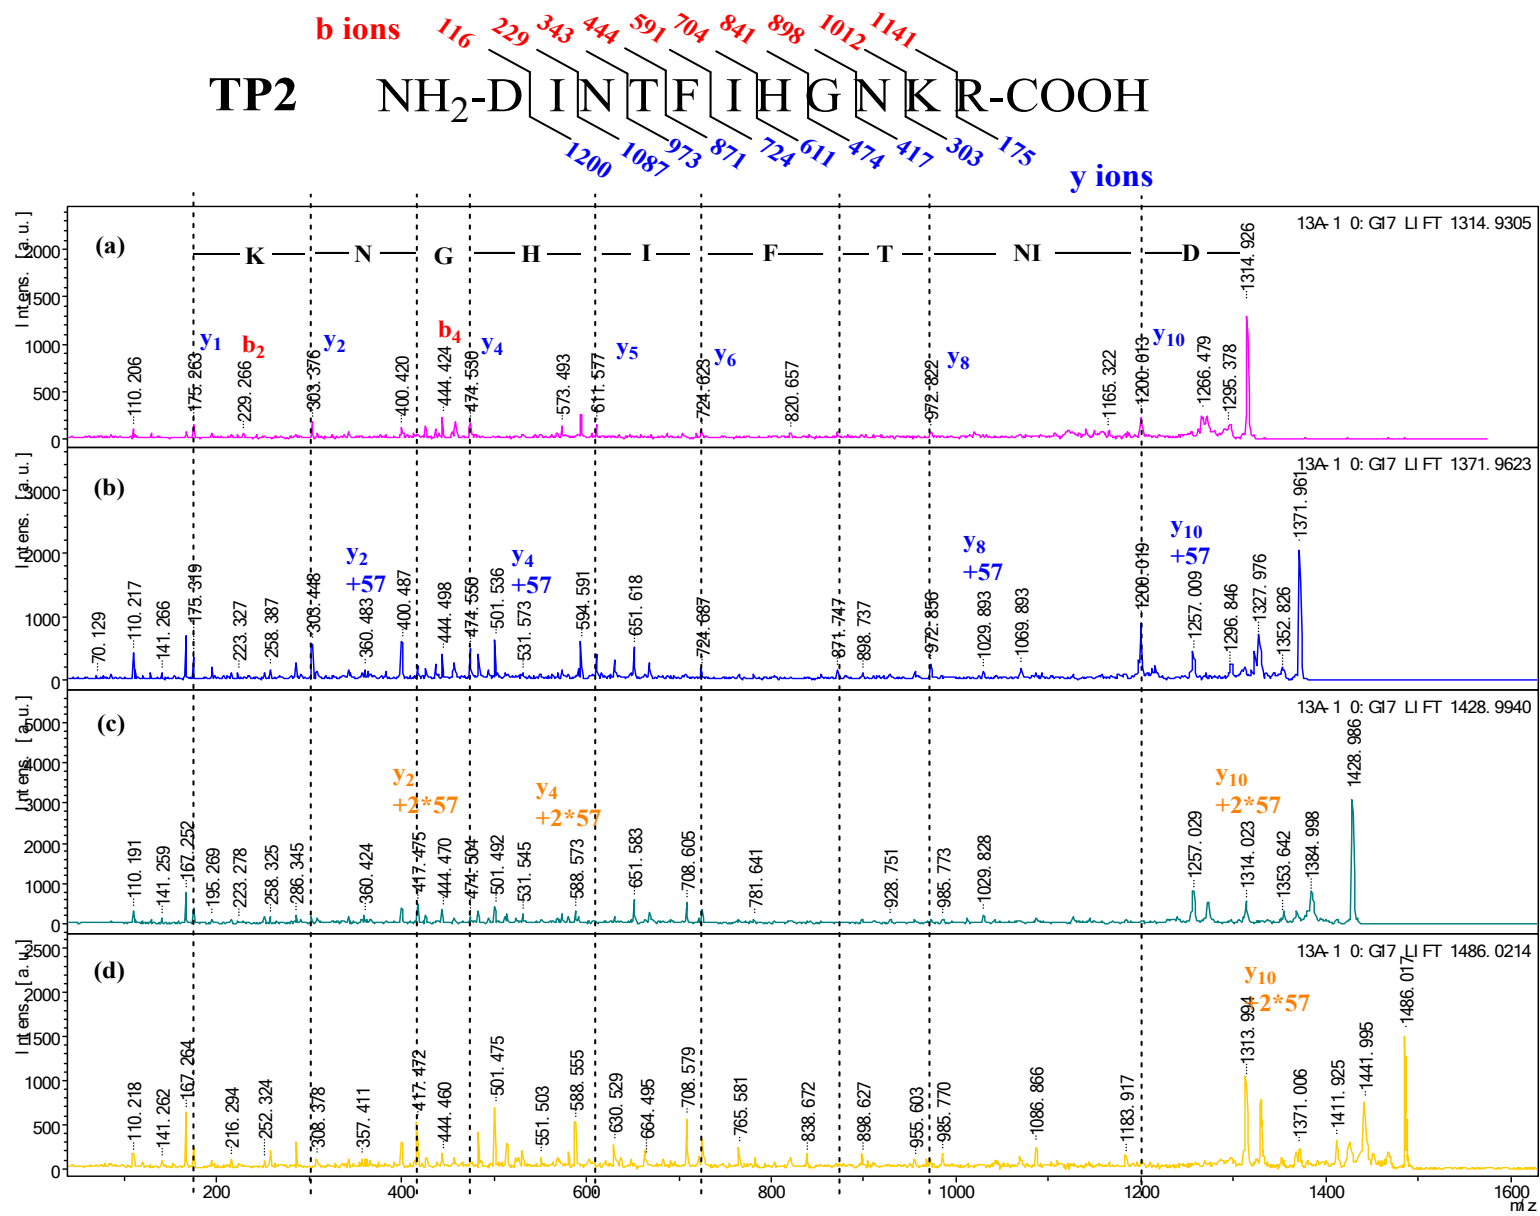

Figure S1. MS/MS results of the TP2 (a) and other peptides in the Group 2: m/z 1371.9 (b), m/z 1428.9 (c) and m/z 1486.1 (d).

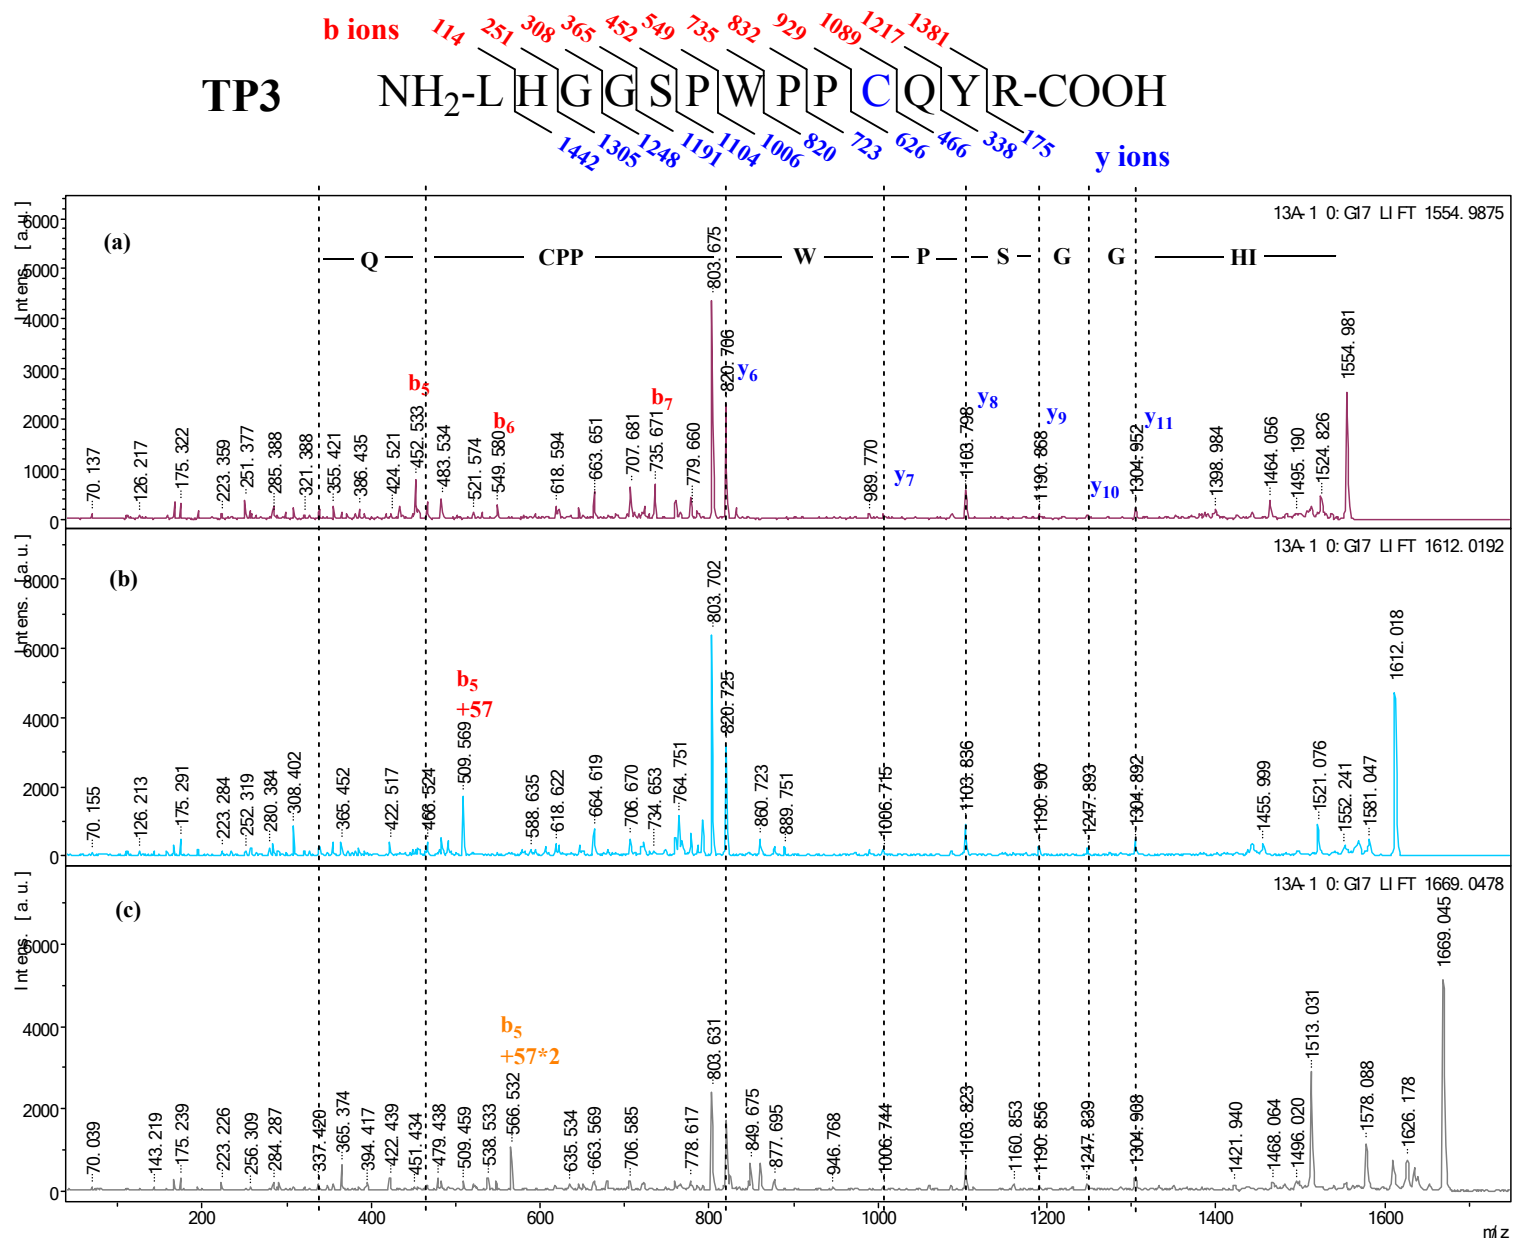

Figure S2. MS/MS results of the TP3 (a) and other peptides in the Group 3: m/z 1612.1 (b) and m/z 1669.1 (c).

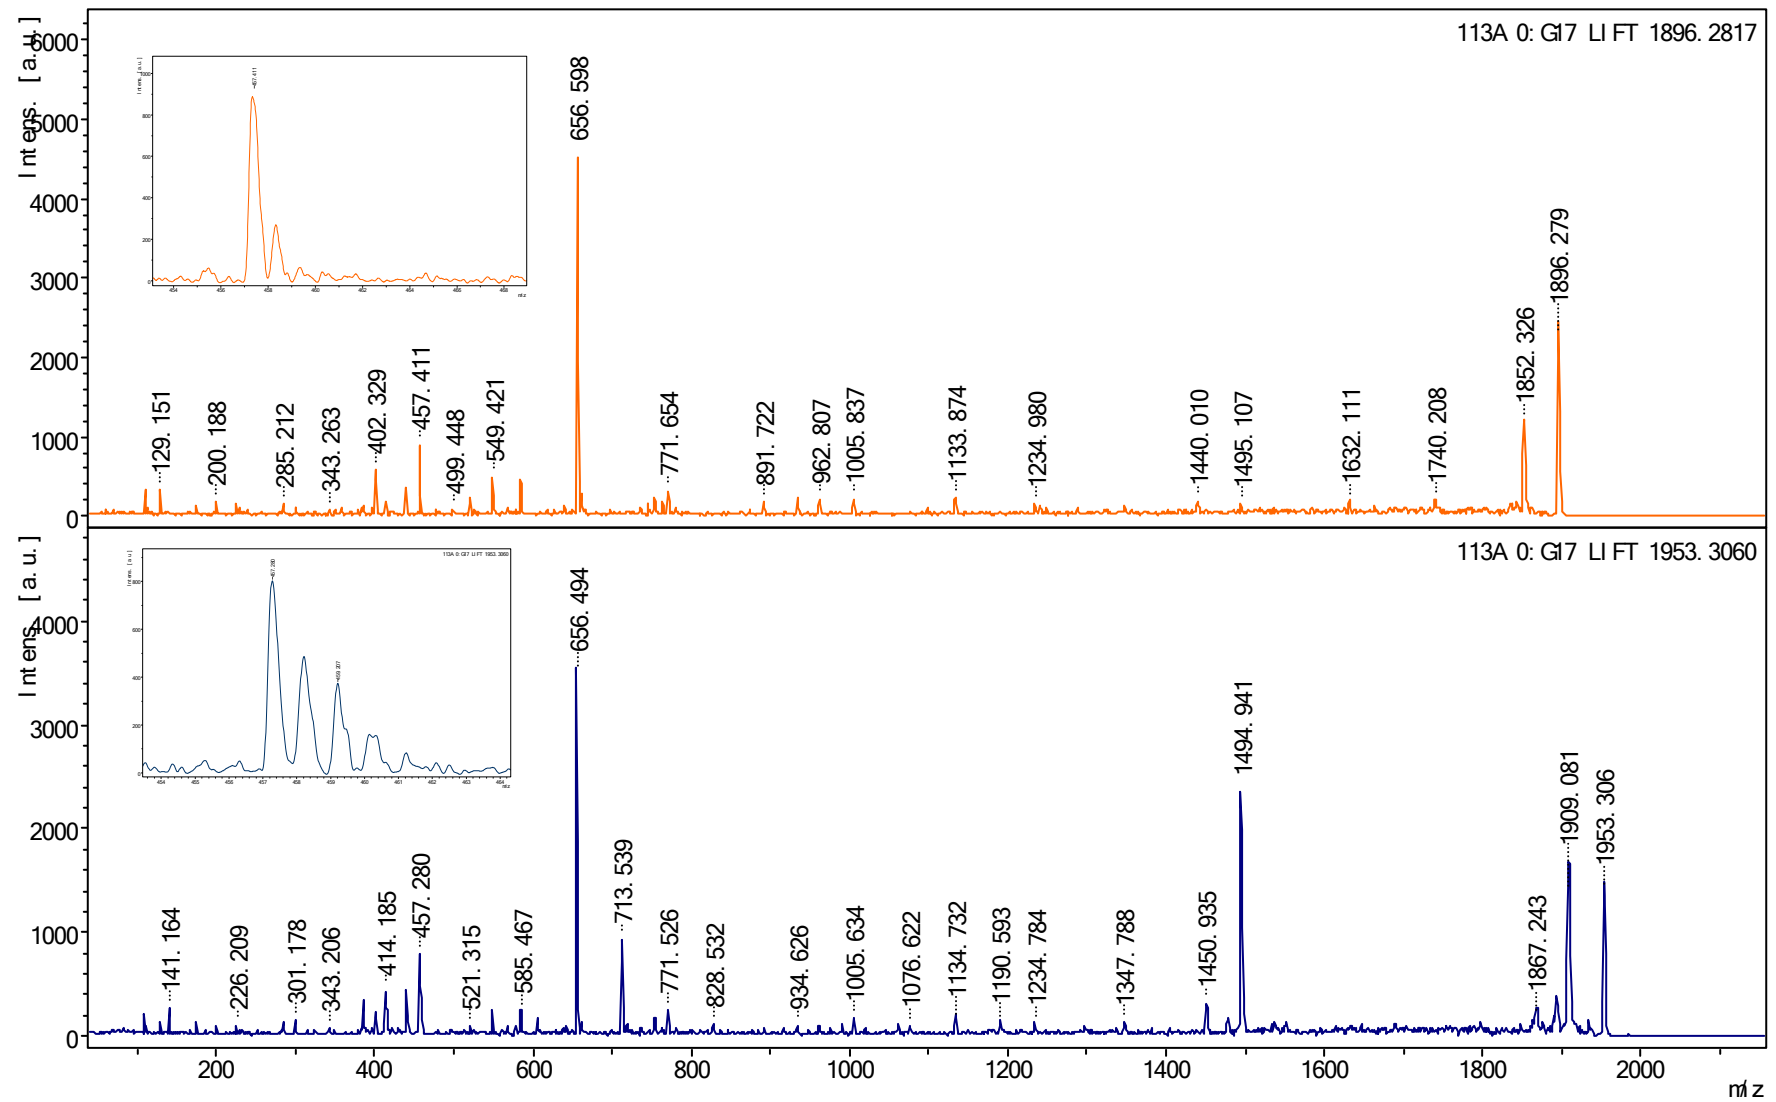

Figure S3. The enlarge MS/MS results of the TP1 (a) and other peptides in the Group 1: m/z 1612.1 (b).

Table S1 The relative standard deviations of each tryptic peptide and its derivatives

| Compound  | Accurate mass | Observed mass | RSD (ppm) |
|-----------|---------------|---------------|-----------|
| TP1       | 1895.941      | 1896.042      | 53.27     |
| TP1+IAA*1 | 1952.993      | 1953.052      | 30.21     |
| TP1+IAA*2 | 2010.045      | 2010.093      | 23.88     |
| TP1+IAA*3 | 2067.097      | 2067.106      | 4.35      |
| TP2       | 1314.692      | 1314.737      | 34.23     |
| TP2+IAA*1 | 1371.744      | 1371.766      | 16.04     |
| TP2+IAA*2 | 1428.796      | 1428.792      | -2.80     |
| TP2+IAA*3 | 1485.848      | 1485.818      | -20.19    |
| TP3+IAA*1 | 1554.728      | 1554.797      | 44.38     |
| TP3+IAA*2 | 1611.780      | 1611.827      | 29.16     |
| TP3+IAA*3 | 1668.832      | 1668.856      | 14.38     |
| TP3+IAA*4 | 1725.884      | 1725.883      | -0.58     |
| TP4+IAA*1 | 2267.161      | 2267.315      | 67.93     |
| TP4+IAA*2 | 2324.213      | 2324.345      | 56.79     |
| TP4+IAA*3 | 2381.265      | 2381.389      | 52.07     |
